# Supplementary material for: Sentinel node involvement with or without completion axillary lymph node dissection: treatment and pathologic results of randomized SERC trial
Source: PubMed Central journal article supplement (PMC8501060; doi:10.1038/s41523-021-00336-3), 2021-10-08
Supplement: 41523_2021_336_MOESM1_ESM.pdf [file 41523_2021_336_MOESM1_ESM.pdf]

**SERC trial group<sup>32</sup> :**

Aubert Agostini<sup>33</sup>  
Olivier Audrin<sup>34</sup>,  
Marie Bannier<sup>1</sup>,  
Issam Baalbaky<sup>35</sup>  
Jean-Marie Brandone<sup>36</sup>,  
Max Buttarelli<sup>1</sup>,  
Victoire Cabaud<sup>37</sup>  
Frédéric Caquant<sup>38</sup>  
Gilles Carrasset<sup>39</sup>  
Jean-Philibert Combier<sup>40</sup>  
Jean-Claude Darmon<sup>6</sup>,  
Thomas Darnaud<sup>41</sup>  
Frédéric Dedecker<sup>42</sup>  
Elodie Demblocque<sup>43</sup>  
Frédéric Grolier<sup>44</sup>  
Brice Gurriet<sup>36</sup>  
Renaud Haberstich<sup>45</sup>  
Sandra Houlard<sup>46</sup>,  
Sophie Knight<sup>1</sup>  
Jean-Marie Ladonne<sup>47</sup>  
Eric Lambaudie<sup>1</sup>  
Jean-François Le Digabel<sup>48</sup>  
Ludvine Loussert<sup>49</sup>  
Catherine Marsollier-Ferrer<sup>50</sup>  
Marc Martino<sup>1, 36</sup>  
Emile Mereb<sup>51</sup>,  
Thierry Miras<sup>52</sup>,  
Pierre Opinel<sup>53</sup>,  
Christiane Pourny<sup>54</sup>  
Sandrine Rua<sup>1</sup>  
Laura Sabiani<sup>1</sup>,  
Nicolas Sterkers<sup>6</sup>  
Romain Saint-Supery<sup>55</sup>,  
Pierrick Theret<sup>56</sup>,  
Charlotte Vaysse<sup>57</sup>

<sup>33</sup>. Hopital Conception, Marseille, France.

<sup>34</sup> Clinique Saint Michel, Toulon, France.

<sup>35</sup>. Hopital de Compiègne, France.

<sup>36</sup>. Hopital Saint Joseph, Marseille, France.

<sup>37</sup>. Hopital de Chambéry, France.

<sup>38</sup> Hopital privé de Villeneuve d'Ascq

<sup>39</sup> Clinique Sainte Clotilde, Saint Denis, La Réunion, France.

<sup>40</sup>. Hotel Dieu du Creusot, France.

<sup>41</sup>. Hopital de Bastia, France.

<sup>42</sup>. Clinique Saint Ame, Lambres les Douai, France.

<sup>43</sup>. Hopital de Beauvais, France.

<sup>44</sup>. Hopital de Troyes, France.

45. Hopital privé Pays de Savoie, Annemasse, France.
46. Centre Hospitalier Bretagne Sud, Lorient, France.
47. Clinique des Ormeaux, Le Havre, France.
48. Hopital privé de l'estuaire, Le Havre, France.
49. Groupe Hospitalier Saint Vincent, Strasbourg, France.
50. Hopital de Nimes, France.
51. Hopital de Manchester, Charleville-Mézières, France.
52. Centre Hospitalier William Morey, Chalon sur Saone, France.
53. Hopital d'Aix en Provence, France.
54. Centre Hospitalier de Soissons, France.
55. Maison de santé, Talence, France.
56. Centre Hospitalier Saint Quentin, France.
57. CHU Toulouse, France.

**Supplemental data file 1:** Characteristics of patients according to arms of randomization.

|                               |              | <b>All</b> |       | <b>ALND arm</b> |       | <b>SLNB arm</b> |       | <b>Chi2</b> |
|-------------------------------|--------------|------------|-------|-----------------|-------|-----------------|-------|-------------|
|                               |              | n          | %     | n               | %     | n               | %     | p           |
| Randomization                 |              | 1855       |       | 929             |       | 926             |       |             |
| pT stage                      | pT1          | 1061       | 58.30 | 524             | 57.71 | 537             | 58.88 | 0.871       |
|                               | pT2          | 681        | 37.42 | 347             | 38.22 | 334             | 36.62 |             |
|                               | pT3          | 30         | 1.65  | 15              | 1.65  | 15              | 1.64  |             |
|                               | pT4          | 11         | 0.60  | 4               | 0.44  | 7               | 0.77  |             |
|                               | pTx          | 37         | 2.03  | 18              | 1.98  | 19              | 2.08  |             |
|                               | Missing data | 35         |       | 21              |       | 14              |       |             |
| T histology                   | Ductal       | 1434       | 78.49 | 721             | 78.97 | 713             | 78.01 | 0.436       |
|                               | Lobular      | 222        | 12.15 | 101             | 11.06 | 121             | 13.24 |             |
|                               | Mixt         | 54         | 2.96  | 30              | 3.29  | 24              | 2.63  |             |
|                               | Others       | 117        | 6.40  | 61              | 6.68  | 56              | 6.13  |             |
|                               | Missing data | 28         |       | 16              |       | 12              |       |             |
| OeR                           | Negative     | 170        | 9.42  | 89              | 9.89  | 81              | 8.95  | 0.495       |
|                               | Positive     | 1635       | 90.58 | 811             | 90.11 | 824             | 91.05 |             |
|                               | Missing data | 50         |       | 29              |       | 21              |       |             |
| PR                            | Negative     | 357        | 19.76 | 181             | 20.07 | 176             | 19.45 | 0.741       |
|                               | Positive     | 1450       | 80.24 | 721             | 79.93 | 729             | 80.55 |             |
|                               | Missing data | 48         |       | 27              |       | 21              |       |             |
| T phenotype                   | ER+ Her2+    | 149        | 8.42  | 78              | 8.81  | 71              | 8.03  | 0.659       |
|                               | ER+ Her2-    | 1461       | 82.59 | 722             | 81.58 | 739             | 83.60 |             |
|                               | ER- Her2+    | 53         | 3.00  | 30              | 3.39  | 23              | 2.60  |             |
|                               | ER- Her2-    | 106        | 5.99  | 55              | 6.21  | 51              | 5.77  |             |
|                               | Missing data | 86         |       | 44              |       | 42              |       |             |
| Extemporaneous<br>SN analysis | No           | 1196       | 66.04 | 589             | 65.08 | 607             | 67.00 | 0.390       |
|                               | Yes          | 615        | 33.96 | 316             | 34.92 | 299             | 33.00 |             |
|                               | Missing data | 44         |       | 24              |       | 20              |       |             |
| SN number                     | 0            | 5          | 0.27  | 3               | 0.33  | 2               | 0.22  | 0.734       |
|                               | 1            | 684        | 37.52 | 352             | 38.60 | 332             | 36.44 |             |
|                               | 2            | 588        | 32.25 | 292             | 32.02 | 296             | 32.49 |             |
|                               | >2           | 546        | 29.95 | 265             | 29.06 | 281             | 30.85 |             |
|                               | Missing data | 32         |       | 17              |       | 15              |       |             |
| Endocrine therapy             | No           | 153        | 9.95  | 73              | 9.49  | 80              | 10.4  | 0.551       |
|                               | Yes          | 1385       | 90.05 | 696             | 90.51 | 689             | 89.60 |             |
|                               | Missing data | 317        |       | 160             |       | 157             |       |             |
| Trastuzumab                   | No           | 1073       | 85.63 | 527             | 84.59 | 546             | 86.67 | 0.295       |
|                               | Yes          | 180        | 14.37 | 96              | 15.41 | 84              | 13.33 |             |
|                               | Missing data | 602        |       | 306             |       | 296             |       |             |
| Radiotherapy                  | No           | 68         | 3.83  | 37              | 4.20  | 31              | 3.47  | 0.427       |
|                               | Yes          | 1707       | 96.17 | 845             | 95.80 | 862             | 96.53 |             |

|          | Missing data | 80   |       | 47  |       | 33  |       |       |
|----------|--------------|------|-------|-----|-------|-----|-------|-------|
| cT stage | cT0-cT1      | 1223 | 65.93 | 609 | 65.55 | 614 | 66.31 | 0.450 |
|          | cT2          | 594  | 32.02 | 297 | 31.97 | 297 | 32.07 |       |
|          | cT3          | 9    | 0.49  | 4   | 0.43  | 5   | 0.54  |       |
|          | Missing data | 29   | 1.56  | 19  | 2.04  | 10  | 1.08  |       |

---

*Legend : T : Tumor, LVI : lympo-vascular invasion, OeR : oestrogen receptor, PR : progesterone receptor, SN : sentinel node*

**Supplemental data file 2: Non-sentinel-node involvement rate.**

|                        |              | ALND |       | NSN = 0 |       | NSN + |       | Chi2              |
|------------------------|--------------|------|-------|---------|-------|-------|-------|-------------------|
|                        |              | n    | %     | n       | %     | n     | %     | p                 |
|                        |              | 840  |       | 654     | 78.3  | 176   | 21.1  |                   |
| T histology            | Ductal       | 655  | 78.16 | 515     | 78.39 | 138   | 78.41 | 0.3909            |
|                        | Lobular      | 95   | 11.34 | 70      | 10.65 | 23    | 13.07 |                   |
|                        | Mixt         | 29   | 3.46  | 21      | 3.20  | 7     | 3.98  |                   |
|                        | Others       | 59   | 7.04  | 51      | 7.76  | 8     | 4.55  |                   |
|                        | Missing data | 2    |       | 2       |       | 0     |       |                   |
| Progesterone receptors | Negative     | 170  | 20.53 | 129     | 19.91 | 41    | 23.43 | 0.3073            |
|                        | Positive     | 658  | 79.47 | 519     | 80.09 | 134   | 76.57 |                   |
|                        | Missing data | 12   |       | 11      |       | 1     |       |                   |
| Endocrine receptors    | Negative     | 82   | 9.90  | 66      | 10.19 | 16    | 9.14  | 0.6829            |
|                        | Positive     | 746  | 90.10 | 582     | 89.81 | 159   | 90.86 |                   |
|                        | Missing data | 12   |       | 11      |       | 1     |       |                   |
| T phenotype            | ER+ Her2+    | 68   | 8.37  | 55      | 8.66  | 13    | 7.51  | 0.9207            |
|                        | ER+ Her2-    | 664  | 81.77 | 516     | 81.26 | 144   | 83.24 |                   |
|                        | ER- Her2+    | 27   | 3.33  | 21      | 3.31  | 6     | 3.47  |                   |
|                        | ER- Her2-    | 53   | 6.53  | 43      | 6.77  | 10    | 5.78  |                   |
|                        | Missing data | 28   |       | 24      |       | 3     |       |                   |
| Number SN              | 0            | 3    | 0.30  | 2       | 0.30  | 1     | 0.57  | 0.7598            |
|                        | 1            | 327  | 39.02 | 263     | 39.97 | 63    | 36.00 |                   |
|                        | 2            | 270  | 32.22 | 209     | 31.76 | 60    | 34.29 |                   |
|                        | >2           | 238  | 28.40 | 184     | 27.96 | 51    | 29.14 |                   |
|                        | Missing data | 2    |       | 1       |       | 1     |       |                   |
| Chemotherapy           | No           | 257  | 30.93 | 230     | 35.11 | 27    | 15.52 | <b>&lt;0.0001</b> |
|                        | NAC          | 28   | 3.37  | 23      | 3.51  | 5     | 2.87  |                   |
|                        | AC           | 546  | 65.70 | 402     | 61.37 | 142   | 81.61 |                   |

|                   |              |     |       |     |       |     |       |        |
|-------------------|--------------|-----|-------|-----|-------|-----|-------|--------|
|                   | Missing data | 9   |       | 4   |       | 2   |       |        |
| Endocrine therapy | No           | 65  | 9.04  | 55  | 9.84  | 10  | 6.37  | 0.1812 |
|                   | Yes          | 654 | 90.96 | 504 | 90.16 | 147 | 93.63 |        |
|                   | Missing data | 121 |       | 100 |       | 19  |       |        |
| Trastuzumab       | No           | 503 | 85.25 | 396 | 85.16 | 105 | 85.37 | 0.9547 |
|                   | Yes          | 87  | 14.75 | 69  | 14.84 | 18  | 14.63 |        |
|                   | Missing data | 250 |       | 194 |       | 53  |       |        |

**Supplemental data file 3:** Characteristics of patients according to groups of treatment realized: ALND and SLND alone.

|               |              | ALND group |       | SLNB group |       | Chi2<br>p |
|---------------|--------------|------------|-------|------------|-------|-----------|
| Randomization |              | 840        |       | 983        |       |           |
| age           | <=40         | 48         | 5.75  | 53         | 5.41  | 0.951     |
|               | 41-75        | 739        | 88.5  | 870        | 88.78 |           |
|               | >75          | 48         | 5.75  | 57         | 5.82  |           |
|               | Missing data | 5          |       | 3          |       |           |
| pT stage      | pT1          | 479        | 57.5  | 578        | 59.04 | 0.888     |
|               | pT2          | 319        | 38.3  | 358        | 36.57 |           |
|               | pT3          | 13         | 1.56  | 17         | 1.74  |           |
|               | pT4          | 4          | 0.48  | 7          | 0.72  |           |
|               | pTx          | 18         | 2.16  | 19         | 1.94  |           |
|               | Missing data | 7          |       | 4          |       |           |
| pT size       | <=10         | 108        | 12.97 | 152        | 15.57 | 0.186     |
|               | 10 to 30     | 633        | 75.99 | 706        | 72.34 |           |
|               | >30          | 92         | 11.04 | 118        | 12.09 |           |
|               | Missing data | 7          |       | 7          |       |           |
| T histology   | Ductal       | 655        | 78.16 | 773        | 78.8  | 0.404     |
|               | Lobular      | 95         | 11.34 | 125        | 12.74 |           |
|               | Mixt         | 29         | 3.46  | 25         | 2.55  |           |
|               | Others       | 59         | 7.04  | 58         | 5.91  |           |
|               | Missing data | 2          |       | 2          |       |           |
| Grade         | 1            | 180        | 22.00 | 217        | 22.49 | 0.365     |
|               | 2            | 429        | 52.44 | 529        | 54.82 |           |
|               | 3            | 209        | 25.55 | 219        | 22.69 |           |
|               | Missing data | 22         |       | 18         |       |           |

|                         |              |     |       |     |       |       |
|-------------------------|--------------|-----|-------|-----|-------|-------|
| LVI                     | No           | 252 | 31.46 | 287 | 30.43 | 0.664 |
|                         | Yes          | 549 | 68.54 | 656 | 69.57 |       |
|                         | Missing data | 39  |       | 40  |       |       |
| Extracapsular extension | No           | 619 | 78.55 | 719 | 78.58 | 0,99  |
|                         | Yes          | 169 | 21.45 | 196 | 21.42 |       |
|                         | Missing data | 52  |       | 68  |       |       |
| ER                      | Negative     | 85  | 10.28 | 85  | 8.76  | 0.274 |
|                         | Positive     | 742 | 89.72 | 885 | 91.24 |       |
|                         | Missing data | 13  |       | 13  |       |       |
| PR                      | Negative     | 170 | 20.53 | 186 | 19.16 | 0.465 |
|                         | Positive     | 658 | 79.47 | 785 | 80.84 |       |
|                         | Missing data | 12  |       | 12  |       |       |
| Endocrine Receptors     | Negative     | 82  | 9.9   | 83  | 8.55  | 0.321 |
|                         | Positive     | 746 | 90.1  | 888 | 91.45 |       |
|                         | Missing data | 12  |       | 12  |       |       |
| Her2                    | Negative     | 721 | 88.25 | 849 | 88.99 | 0.623 |
|                         | Positive     | 96  | 11.75 | 105 | 11.01 |       |
|                         | Missing data | 23  |       | 29  |       |       |
| Ki67 or MIB1            | <=10         | 252 | 38.01 | 340 | 43.09 | 0.145 |
|                         | 11 to 20     | 181 | 27.3  | 199 | 25.22 |       |
|                         | > 20         | 230 | 34.69 | 250 | 31.69 |       |
|                         | Missing data | 177 |       | 194 |       |       |
| T phenotype             | ER+ Her2+    | 68  | 8.37  | 79  | 8.32  | 0.73  |
|                         | ER+ Her2-    | 664 | 81.77 | 792 | 83.37 |       |
|                         | ER- Her2+    | 27  | 3.33  | 26  | 2.74  |       |
|                         | ER- Her2-    | 53  | 6.53  | 53  | 5.58  |       |
|                         | Missing data | 28  |       | 33  |       |       |
| Extemporaneous          | No           | 533 | 64.22 | 655 | 67.53 | 0.14  |



|                    |              |     |       |     |       |               |
|--------------------|--------------|-----|-------|-----|-------|---------------|
| SN analysis        | Yes          | 297 | 35.78 | 315 | 32.47 |               |
|                    | Missing data | 10  |       | 13  |       |               |
| SN number          | 0            | 3   | 0.36  | 2   | 0.2   | 0.493         |
|                    | 1            | 327 | 39.02 | 357 | 36.47 |               |
|                    | 2            | 270 | 32.22 | 314 | 32.07 |               |
|                    | >2           | 238 | 28.4  | 306 | 31.26 |               |
|                    | Missing data | 2   |       | 4   |       |               |
| positive SN number | <=2          | 797 | 97.43 | 939 | 97.71 | 0.704         |
|                    | >2           | 21  | 2.57  | 22  | 2.29  |               |
|                    | Missing data | 1   |       | 2   |       |               |
| SN status          | pN0 (i+)     | 33  | 4.27  | 66  | 7.35  | <b>0.0246</b> |
|                    | pN1mi        | 216 | 27.94 | 254 | 28.29 |               |
|                    | pN1macro     | 524 | 67.79 | 578 | 64.37 |               |
|                    | Missing data | 67  |       | 85  |       |               |
| Chemotherapy       | No           | 257 | 30.93 | 308 | 31.98 | 0.5866        |
|                    | NAC          | 28  | 3.37  | 25  | 2.6   |               |
|                    | AC           | 546 | 65.7  | 630 | 65.42 |               |
|                    | Missing data | 9   |       | 20  |       |               |
| AC time            | before ALND  | 150 | 27.88 |     |       |               |
|                    | after ALND   | 388 | 72.11 |     |       |               |
|                    | Missing data | 8   |       |     |       |               |
| Endocrine therapy  | No           | 65  | 9.04  | 88  | 10.74 | 0.265         |
|                    | Yes          | 654 | 90.96 | 731 | 89.26 |               |
|                    | Missing data | 121 |       | 164 |       |               |
| Trastuzumab        | No           | 503 | 85.25 | 570 | 85.97 | 0.717         |
|                    | Yes          | 87  | 14.75 | 93  | 14.03 |               |
|                    | Missing data | 250 |       | 320 |       |               |
| Surgery            | Conservative | 682 | 81.29 | 777 | 79.2  | 0.28          |

|              |     |       |     |      |
|--------------|-----|-------|-----|------|
| Mastectomy   | 157 | 18.71 | 204 | 20.8 |
| Missing data | 1   |       | 2   |      |

---

*Legend : T : tumor, LVI : lympho-vascular invasion, SN : sentinel node, AC : adjuvant chemotherapy.*

**Supplemental data file 4: Number of positive-NSN.**

| Number of positive-NSN     | 1 positive-NSN  | 2 positive-NSN | >2 positive-NSN |
|----------------------------|-----------------|----------------|-----------------|
|                            | 104 (12.5%)     | 24 (2.9%)      | 48 (5.7%)       |
| SN ITC or micro-metastases | 16/247 (6.5%)   | 4/247 (1.6%)   | 4/247 (1.6%)    |
| SN macro-metastases        | 75/522 (14.4%)  | 17/522 (3.3%)  | 42/522 (8.0%)   |
| no AC                      | 18/257 (7%)     | 6/257 (2.3%)   | 3/257 (1.2%)    |
| cALND before AC            | 18/149* (12.1%) | 4/149 (2.7%)   | 2/149 (1.3%)    |
| cALND after AC             | 63/387° (10.6%) | 14/387 (3.6%)  | 41/387 (10.6%)  |

\* 1 patient with unknown number of positive-NSN

° 1 patient with unknown number of positive-NSN

SN: sentinel node, AC: adjuvant chemotherapy, cALND: axillary lymph node dissection completion.

**Supplemental data file 5 : patient's characteristics between center 1 and others centers**

|                          |              | <b>All</b> |       | <b>Center 1</b> |       | <b>Other Centers</b> |       | <b>Chi2</b> |
|--------------------------|--------------|------------|-------|-----------------|-------|----------------------|-------|-------------|
|                          |              | n          | %     | n               | %     | n                    | %     | p           |
| Randomization            |              | 1855       |       | 472             | 25.44 | 1383                 | 75.56 |             |
| age                      | <=40         | 104        | 5.65  | 34              | 7.20  | 70                   | 5.11  | 0.052       |
|                          | 41-75        | 1633       | 88.65 | 404             | 85.59 | 1229                 | 89.71 |             |
|                          | >75          | 105        | 5.7   | 34              | 7.20  | 71                   | 5.18  |             |
|                          | Missing data | 13         |       | 0               |       | 13                   |       |             |
| pT size                  | <=10         | 260        | 14.32 | 66              | 14.19 | 194                  | 14.36 | <0.001      |
|                          | 10 to 30     | 1345       | 74.06 | 319             | 68.60 | 1026                 | 75.94 |             |
|                          | >30          | 211        | 11.62 | 80              | 17.20 | 131                  | 9.70  |             |
|                          | Missing data | 39         |       | 7               |       | 32                   |       |             |
| Grade                    | 1            | 397        | 22.17 | 111             | 24.13 | 286                  | 21.49 | 0.178       |
|                          | 2            | 962        | 53.71 | 230             | 50.00 | 732                  | 55.00 |             |
|                          | 3            | 432        | 24.12 | 119             | 25.87 | 313                  | 23.52 |             |
|                          | Missing data | 64         |       | 12              |       | 52                   |       |             |
| LVI                      | No           | 543        | 30.99 | 170             | 37.53 | 373                  | 28.71 | 0.001       |
|                          | Yes          | 1209       | 69.01 | 283             | 62.47 | 926                  | 71.29 |             |
|                          | Missing data | 103        |       | 19              |       | 84                   |       |             |
| Extra-capsular extension | No           | 1340       | 78.5  | 357             | 79.51 | 983                  | 78.14 | 0.544       |
|                          | Yes          | 367        | 21.5  | 92              | 20.49 | 275                  | 21.86 |             |
|                          | Missing data | 148        |       | 23              |       | 125                  |       |             |
| Endocrine Receptors      | Negative     | 165        | 9.13  | 50              | 10.80 | 115                  | 8.56  | 0.149       |
|                          | Positive     | 1642       | 90.87 | 413             | 89.20 | 1229                 | 91.44 |             |
|                          | Missing data | 48         |       | 9               |       | 39                   |       |             |
| Her2                     | Negative     | 1575       | 88.58 | 391             | 84.09 | 1184                 | 90.18 | 0.001       |
|                          | Positive     | 203        | 11.42 | 74              | 15.91 | 129                  | 9.82  |             |
|                          | Missing data | 77         |       | 7               |       | 70                   |       |             |
| Ki67 or MIB1             | <=10         | 594        | 40.74 | 181             | 40.86 | 415                  | 40.81 | 0.292       |
|                          | 11 to 20     | 381        | 26.13 | 105             | 23.70 | 276                  | 27.14 |             |
|                          | > 20         | 483        | 33.13 | 157             | 35.44 | 326                  | 32.06 |             |
|                          | Missing data | 397        |       | 29              |       | 366                  |       |             |
| positive SN number       | <=2          | 1741       | 97.59 | 439             | 96.91 | 1302                 | 97.82 | 0.275       |
|                          | >2           | 43         | 2.41  | 14              | 3.09  | 29                   | 2.28  |             |
|                          | Missing data | 30         |       | 5               |       | 25                   |       |             |
| SN status                | pN0 (i+)     | 99         | 5.91  | 61              | 13.20 | 38                   | 3.13  | <0.001      |
|                          | pN1mi        | 471        | 28.12 | 148             | 32.03 | 323                  | 26.63 |             |
|                          | pN1macro     | 1105       | 65.97 | 253             | 54.76 | 852                  | 70.24 |             |
|                          | Missing data | 180        |       | 10              |       | 170                  |       |             |
| Chemotherapy             | No           | 566        | 31,51 | 131             | 28.42 | 435                  | 32.58 | <0.001      |
|                          | NAC          | 53         | 2,95  | 25              | 5.42  | 28                   | 2.10  |             |
|                          | AC           | 1177       | 65,53 | 305             | 66.16 | 872                  | 65.32 |             |

|         |              |      |       |     |       |      |       |        |
|---------|--------------|------|-------|-----|-------|------|-------|--------|
|         | Missing data | 59   |       | 11  |       | 48   |       |        |
| Surgery | Conservative | 1466 | 80.15 | 342 | 73.23 | 1124 | 82.53 | <0.001 |
|         | Mastectomy   | 363  | 19.85 | 125 | 26.77 | 238  | 17.47 |        |
|         | Missing data | 26   |       | 5   |       | 21   |       |        |

*Legend : T : Tumor, LVI : lympo-vascular invasion, SN : sentinel node.*
